# Supplementary material for: Myalgic Encephalomyelitis/Chronic Fatigue Syndrome (ME/CFS) is common in post-acute sequelae of SARS-CoV-2 infection (PASC): Results from a post-COVID-19 multidisciplinary clinic
Source: bioRxiv or medRxiv preprint supplement (doi:10.1101/2022.08.03.22278363), 2022-08-04
Supplement: Supplementary file [file media-1.pdf]

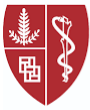

**First assessment Post Covid infection**

Name: \_\_\_\_\_

Date of Birth: \_\_\_\_\_

COVID-19 Symptoms: Start date \_\_\_\_\_

Duration of Symptoms (days) \_\_\_\_\_

Date of Positive Test *(if not done at Stanford, please provide copy of the results)*: \_\_\_\_\_

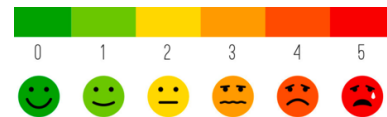

**What were your symptoms during the initial COVID-19 infection? Please also select severity.**

| Symptoms during acute COVID-19 Infection | Yes | No | Severity (1=mild, 5=severe) |
|------------------------------------------|-----|----|-----------------------------|
| Fever                                    |     |    |                             |
| Chills                                   |     |    |                             |
| Headache                                 |     |    |                             |
| Decrease appetite                        |     |    |                             |
| Nose congestion                          |     |    |                             |
| Sore throat                              |     |    |                             |
| Fatigue                                  |     |    |                             |

|                            |  |  |  |
|----------------------------|--|--|--|
| Brain fog or confusion     |  |  |  |
| Unrefreshing sleep         |  |  |  |
| Difficulty sleeping        |  |  |  |
| Daytime sleepiness         |  |  |  |
| More fatigue with activity |  |  |  |
| Change in smell            |  |  |  |
| Change in taste            |  |  |  |
| Ear pain                   |  |  |  |
| New anxiety or depression  |  |  |  |
| Paranoid thoughts          |  |  |  |
| Hallucinations             |  |  |  |

|                              |  |  |  |
|------------------------------|--|--|--|
| Cough                        |  |  |  |
| Chest pain                   |  |  |  |
| Difficulty breathing at rest |  |  |  |

|                                    |  |  |  |
|------------------------------------|--|--|--|
| Difficulty breathing while walking |  |  |  |
| Wheezing                           |  |  |  |

|                                                         |  |  |  |
|---------------------------------------------------------|--|--|--|
| Lightheadedness on standing                             |  |  |  |
| Fainting spells                                         |  |  |  |
| Changes in sweating (more or less)                      |  |  |  |
| Nausea, vomiting, or diarrhea, bloating or constipation |  |  |  |
| Changes in color of hands or feet                       |  |  |  |
| Urinary difficulties                                    |  |  |  |

\*modified scale from reference: Klok FA, Boon GJAM, Barco S, et al. The Post-COVID-19 Functional Status scale: a tool to measure functional status over time after COVID-19. Eur Respir J 2020; 56: 2001494

## New Patient Questionnaire – Post-COVID Infection

(Please complete within 7 days of the office visit)

Name: \_\_\_\_\_ Date of Birth: \_\_\_\_\_

COVID-19 Symptoms: Start date \_\_\_\_\_ Duration of Symptoms (days):  
\_\_\_\_\_

Date of Positive Test *(if not done at Stanford, please provide copy of the results)*:  
\_\_\_\_\_

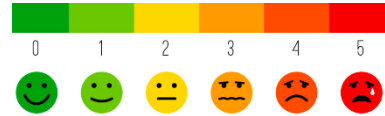

**What symptoms are you currently experiencing? Select severity from scale of 1 to 5.**

| Current symptoms  | Yes | No | Severity (1=mild, 5=severe) |
|-------------------|-----|----|-----------------------------|
| Fever             |     |    |                             |
| Chills            |     |    |                             |
| Headache          |     |    |                             |
| Decrease appetite |     |    |                             |
| Nose congestion   |     |    |                             |
| Sore throat       |     |    |                             |
| Fatigue           |     |    |                             |

|                            |  |  |  |
|----------------------------|--|--|--|
| Brain fog or confusion     |  |  |  |
| Unrefreshing sleep         |  |  |  |
| Difficulty sleeping        |  |  |  |
| Daytime sleepiness         |  |  |  |
| More fatigue with activity |  |  |  |
| Change in smell            |  |  |  |
| Change in taste            |  |  |  |
| Ear pain                   |  |  |  |
| New anxiety or depression  |  |  |  |
| Paranoid thoughts          |  |  |  |
| Hallucinations             |  |  |  |

|                                    |  |  |  |
|------------------------------------|--|--|--|
| Cough                              |  |  |  |
| Chest pain                         |  |  |  |
| Difficulty breathing at rest       |  |  |  |
| Difficulty breathing while walking |  |  |  |
| Wheezing                           |  |  |  |

|                                                      |  |  |  |
|------------------------------------------------------|--|--|--|
| Lightheadedness on standing                          |  |  |  |
| Fainting spells                                      |  |  |  |
| Changes in sweating (more or less)                   |  |  |  |
| Nausea, vomiting, diarrhea, bloating or constipation |  |  |  |
| Changes in color of hands or feet                    |  |  |  |
| Urinary difficulties                                 |  |  |  |

**What is your current functional status in this post-acute COVID-19 phase?**

| Current Functional Status                     | Yes | No | Stage  |
|-----------------------------------------------|-----|----|--------|
| No symptoms                                   |     |    | I      |
| No limitation but I feel some symptoms        |     |    | II     |
| I avoid some of my daily activities           |     |    | III    |
| I struggle to take care of myself             |     |    | IV     |
| I am in bed all or nearly all the time        |     |    | V      |
| I was hospitalized for COVID-related symptoms |     |    | Severe |

\*

### Have you been vaccinated for COVID-19?

| Vaccine Type           | Select one below | Date, first dose | Date, second dose |
|------------------------|------------------|------------------|-------------------|
| BioNTech, Pfizer       |                  |                  |                   |
| Moderna, NIAID         |                  |                  |                   |
| Johnson & Johnson (JJ) |                  |                  |                   |
| No vaccination         |                  |                  |                   |

\*modified scale from reference: Klok FA, Boon GJAM, Barco S, et al. The Post-COVID-19 Functional Status scale: a tool to measure functional status over time after COVID-19. Eur Respir J 2020; 56: 2001494

### Supplementary Tables (2 and 3) **Supplementary Tables.**

**Table 3. Distribution of Comorbid Condition on PASC Population.**

| Comorbidities             | Number/Percentage |
|---------------------------|-------------------|
| BMI $\geq$ 30             | 47 (35.1%)        |
| Hypertension              | 24 (17.9%)        |
| Chronic Lung Disease      | 17 (12.7%)        |
| Diabetes Mellitus         | 9 (6.7%)          |
| Cardiovascular Disease    | 4 (3%)            |
| Immunosuppressive therapy | 5 (3.7%)          |
| HIV (+)                   | 1 (0.7%)          |
| Cirrhosis                 | 1 (0.7%)          |

PASC: Post-Acute Sequela of SARS-Cov-2 infection

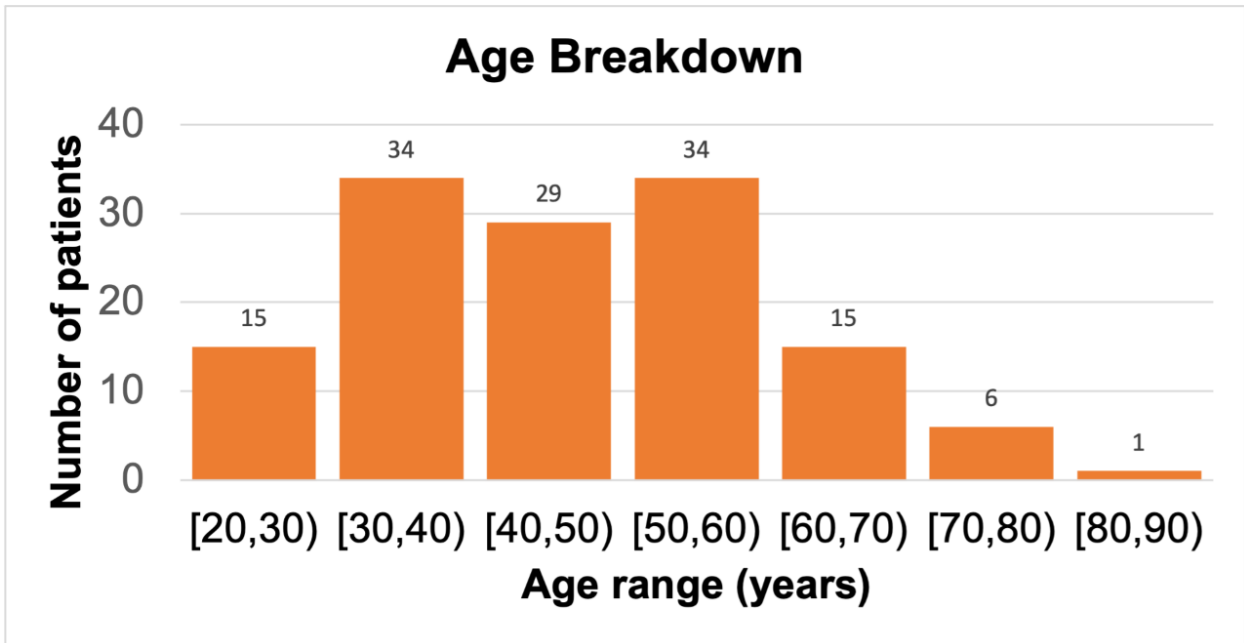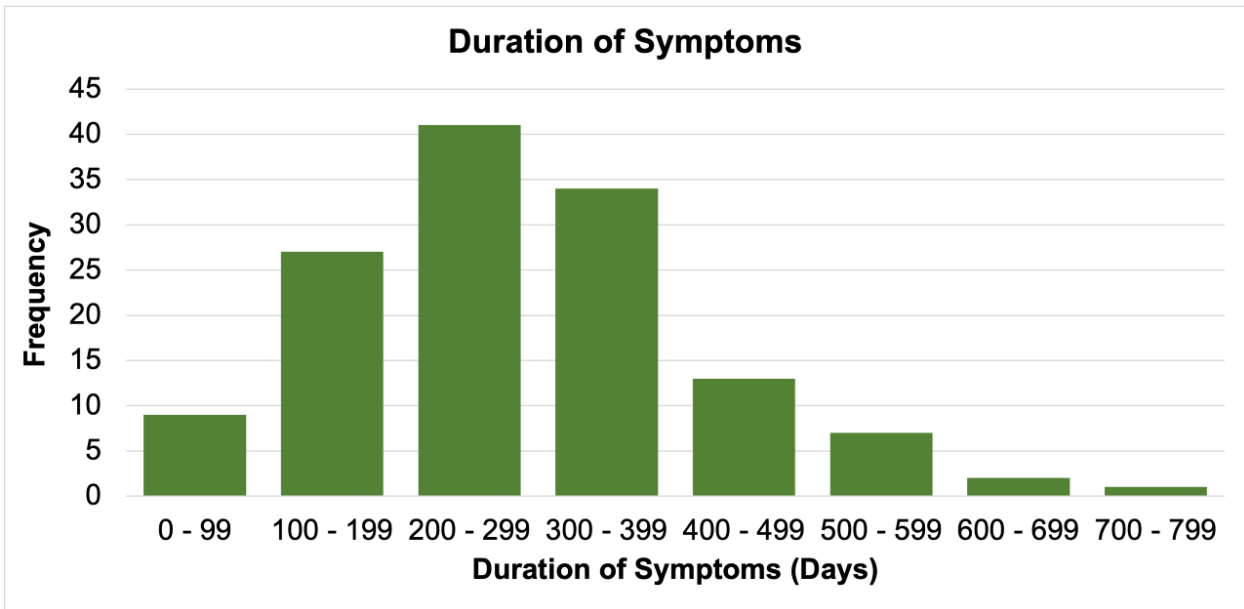

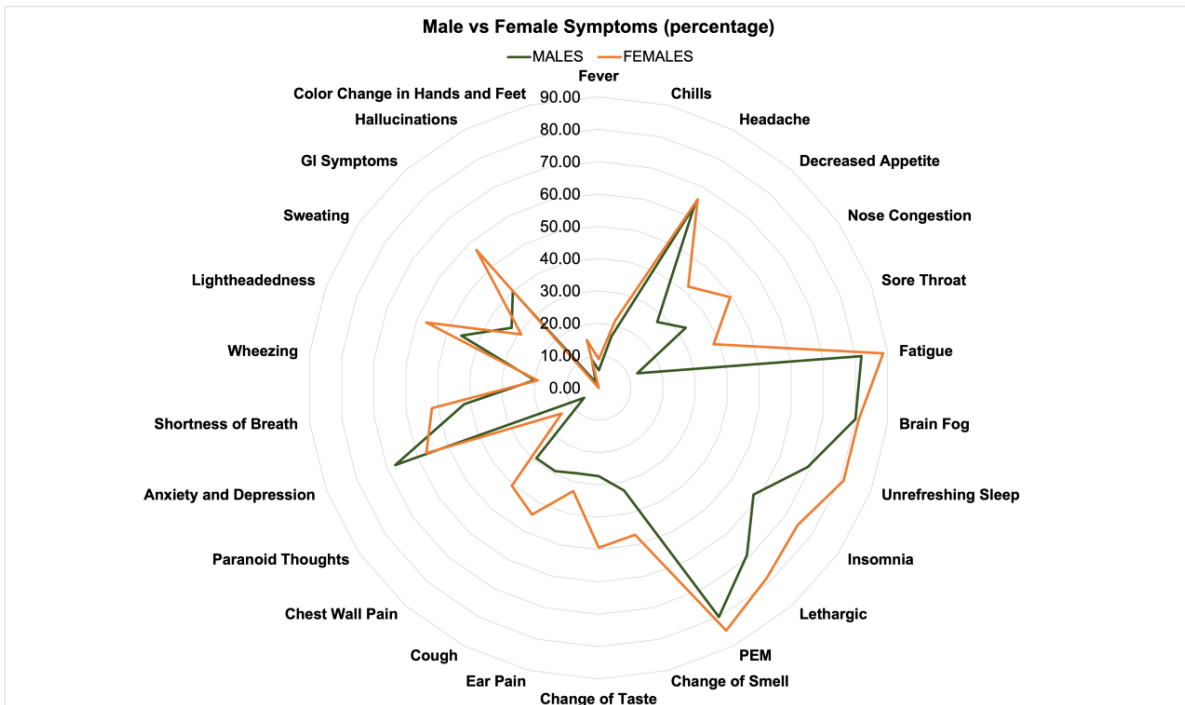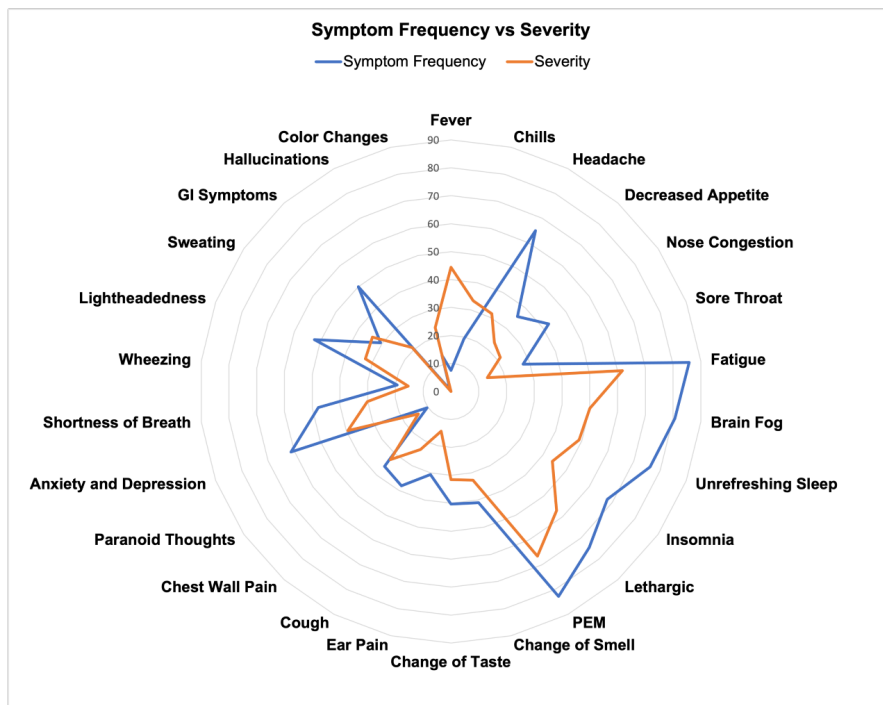

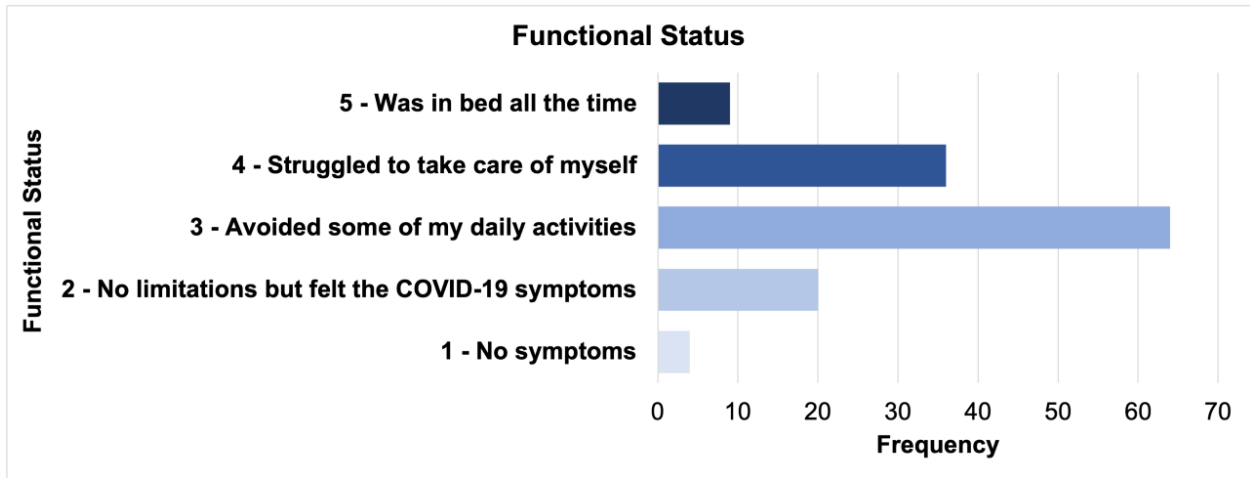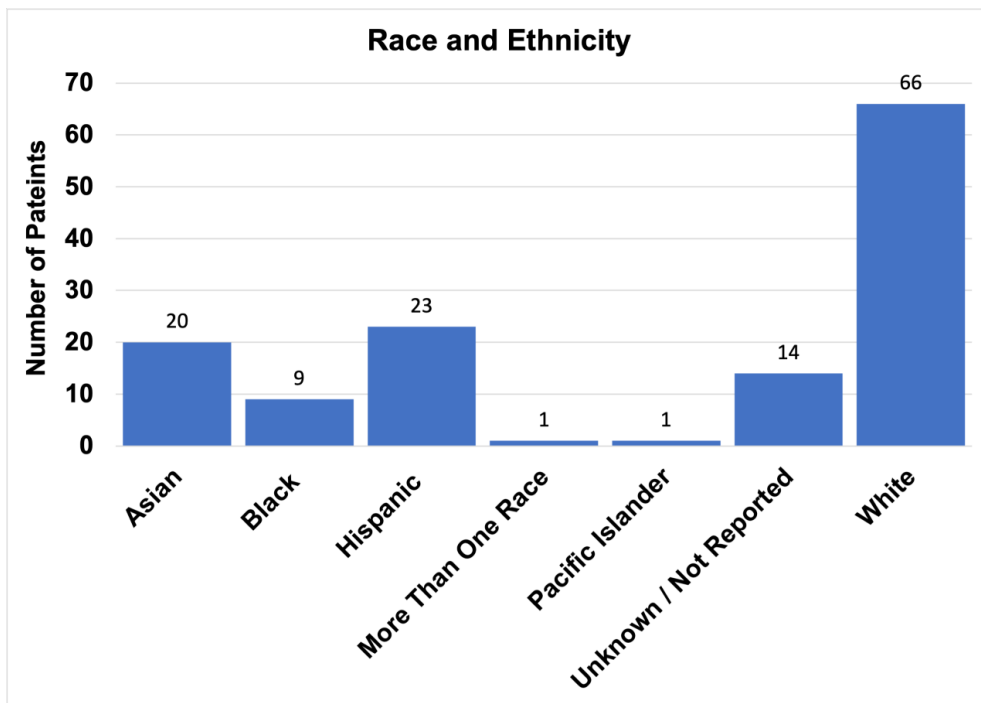

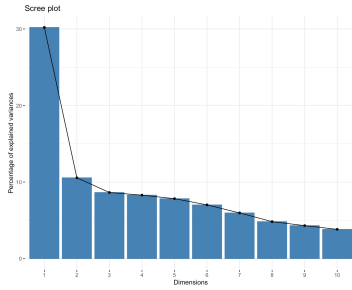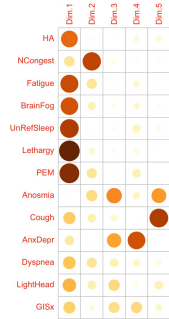

### 13 most common symptoms

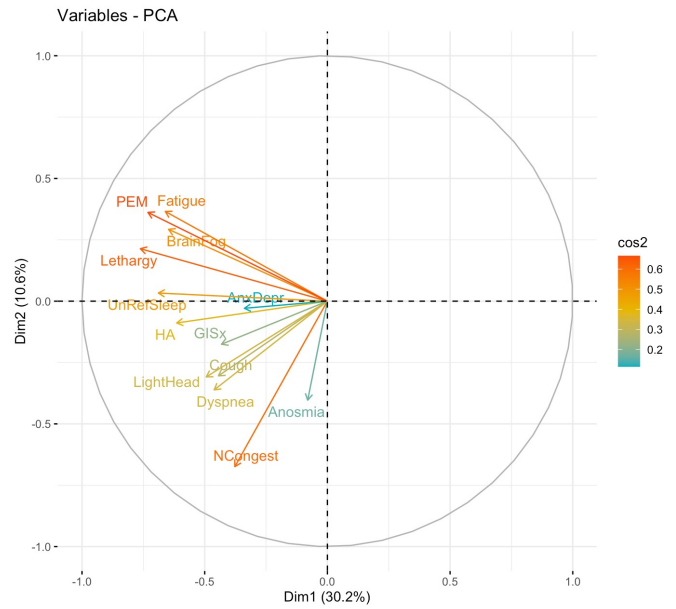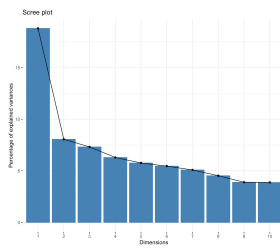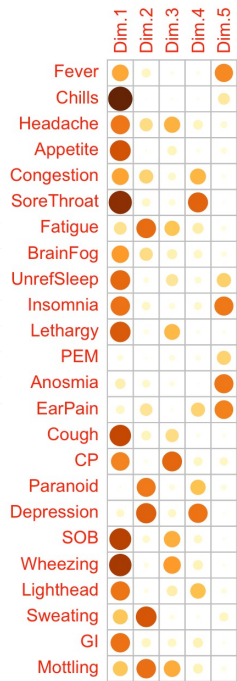

### Total Symptoms, and distribution by sex

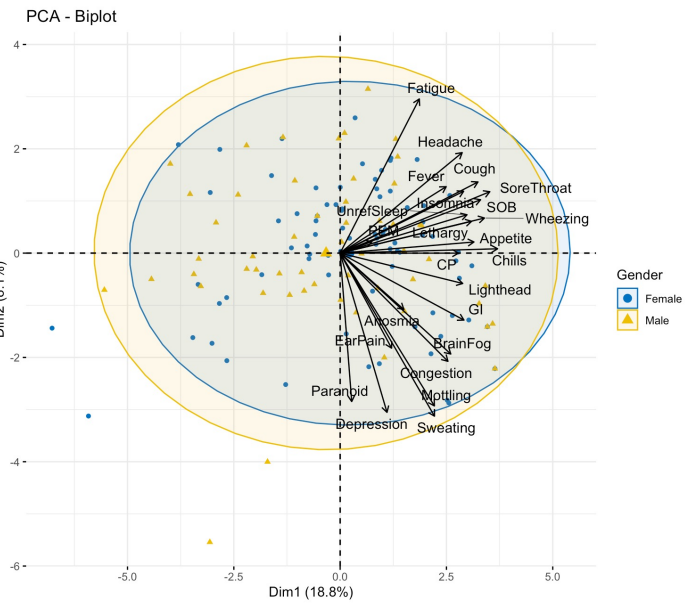



| Common symptoms male: |            |                  |                             |
|-----------------------|------------|------------------|-----------------------------|
|                       | eigenvalue | variance.percent | cumulative.variance.percent |
| Dim.1                 | 8.1318023  | 24.360787        | 24.09079                    |
| Dim.2                 | 1.7423391  | 13.403070        | 37.49386                    |
| Dim.3                 | 1.4480801  | 11.390832        | 48.88469                    |
| Dim.4                 | 1.2178200  | 9.367846         | 58.25253                    |
| Dim.5                 | 1.0789056  | 8.306966         | 66.55950                    |
| Dim.6                 | 1.0063531  | 7.741177         | 74.30068                    |
| Dim.7                 | 0.7773718  | 5.919783         | 80.28046                    |
| Dim.8                 | 0.6786311  | 5.220239         | 85.50070                    |
| Dim.9                 | 0.5662909  | 4.356004         | 89.85678                    |
| Dim.10                | 0.4300200  | 3.307846         | 93.16463                    |
| Dim.11                | 0.3619187  | 2.783990         | 95.94862                    |
| Dim.12                | 0.2912270  | 2.240208         | 98.18883                    |
| Dim.13                | 0.2354524  | 1.811172         | 100.00000                   |

  

| Common symptoms female: |            |                  |                             |
|-------------------------|------------|------------------|-----------------------------|
|                         | eigenvalue | variance.percent | cumulative.variance.percent |
| Dim.1                   | 4.6530112  | 35.792393        | 35.79239                    |
| Dim.2                   | 1.3126076  | 10.096982        | 45.88938                    |
| Dim.3                   | 1.1123348  | 8.556422         | 54.44580                    |
| Dim.4                   | 1.0321811  | 7.939854         | 62.38565                    |
| Dim.5                   | 0.9694872  | 7.457594         | 69.84325                    |
| Dim.6                   | 0.8592313  | 6.609471         | 76.45272                    |
| Dim.7                   | 0.7104871  | 5.465285         | 81.91800                    |
| Dim.8                   | 0.6237441  | 4.798032         | 86.71603                    |
| Dim.9                   | 0.4749512  | 3.653471         | 90.36950                    |
| Dim.10                  | 0.4092251  | 3.147885         | 93.51739                    |
| Dim.11                  | 0.3378931  | 2.599177         | 96.11657                    |
| Dim.12                  | 0.2780808  | 2.146221         | 98.26279                    |
| Dim.13                  | 0.2258376  | 1.737212         | 100.00000                   |

  

| Common symptoms total: |            |                  |                             |
|------------------------|------------|------------------|-----------------------------|
|                        | eigenvalue | variance.percent | cumulative.variance.percent |
| Dim.1                  | 3.9263275  | 30.202520        | 30.20252                    |
| Dim.2                  | 1.3727348  | 10.559499        | 40.76202                    |
| Dim.3                  | 1.1223366  | 8.637974         | 49.39999                    |
| Dim.4                  | 1.0777255  | 8.290196         | 57.69019                    |
| Dim.5                  | 1.0180687  | 7.891236         | 65.58142                    |
| Dim.6                  | 0.9121950  | 7.016885         | 72.59831                    |
| Dim.7                  | 0.7159016  | 5.568481         | 78.16679                    |
| Dim.8                  | 0.6273013  | 4.830156         | 83.00695                    |
| Dim.9                  | 0.5602774  | 4.309826         | 87.31677                    |
| Dim.10                 | 0.4973165  | 3.825512         | 91.14228                    |
| Dim.11                 | 0.4072518  | 3.132706         | 94.27499                    |
| Dim.12                 | 0.3895180  | 2.996292         | 97.27128                    |
| Dim.13                 | 0.3118331  | 2.388717         | 100.00000                   |

Eigenvalues 12 domains (Top total, Middle female and low male)

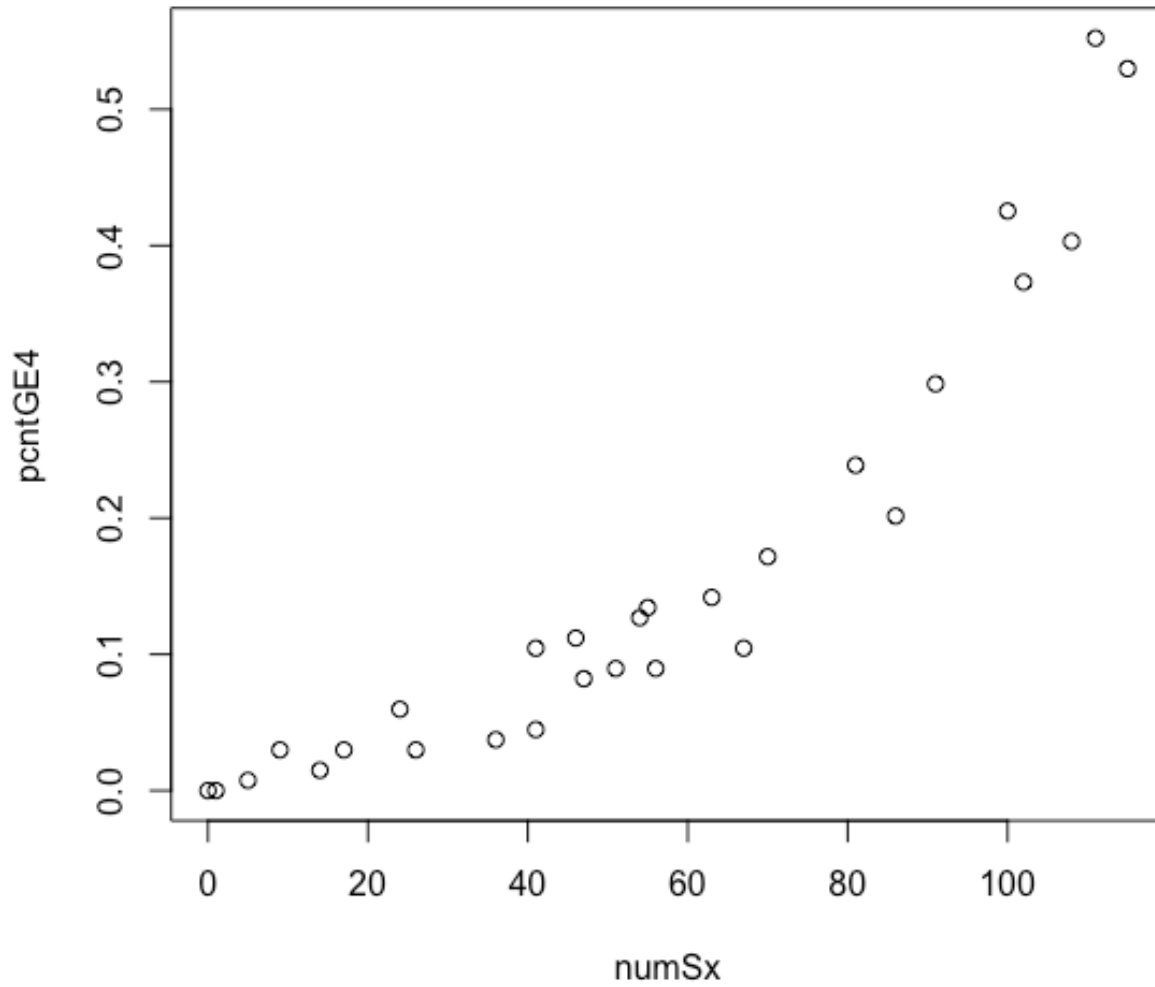

Parson Correlation Coefficient (PCC) frequency of 29 symptoms and severity (Likert scale 4 and 5).
